# Supplementary material
Source: MDPI journal article supplement (https://www.mdpi.com/2311-5637/9/4/402)
Supplement: s1 [file s1 › fermentation-2290871-supplementary.pdf]

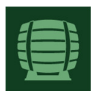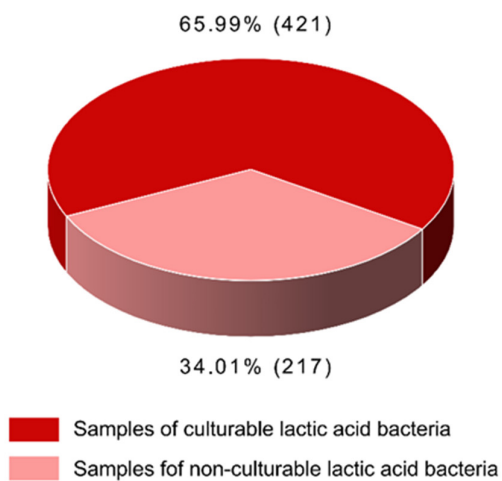

**Figure S1.** A pie chart of the number of samples of culturable lactic acid bacteria and the number of samples of non-culturable LAB.

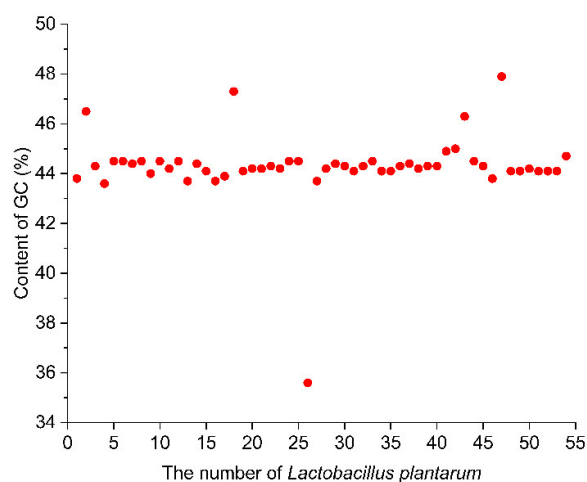

(A)

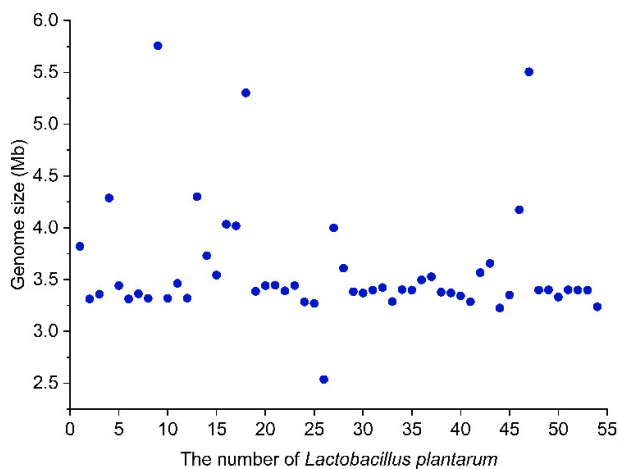

(B)

**Figure S2.** GC content and genomic size of *Lactobacillus plantarum*. (A) GC content distribution of *L. plantarum*. (B) Genomic size distribution of *L. plantarum*.

**Table S1.** Detailed information of 54 strains of *Lactobacillus plantarum*.

| Strains | Habitat                 | Sampling place                                                 |
|---------|-------------------------|----------------------------------------------------------------|
| A182    | Fermented bean products | Fuyuan County, Qujing City                                     |
| A234    | Fermented vegetables    | Wuhua District, Kunming City                                   |
| A241    | Fermented vegetables    | Wuhua District, Kunming City                                   |
| A464    | Fermented vegetables    | Chuxiong City, Chuxiong Yi Autonomous Prefecture               |
| A465    | Fermented vegetables    | Chuxiong City, Chuxiong Yi Autonomous Prefecture               |
| A466    | Fermented vegetables    | Chuxiong City, Chuxiong Yi Autonomous Prefecture               |
| A553    | Fermented bean products | Kunming City                                                   |
| A555    | Fermented bean products | Kunming City                                                   |
| A7310   | Fermented vegetables    | Xuanwei City, Qujing City                                      |
| A736    | Fermented vegetables    | Xuanwei City, Qujing City                                      |
| A739    | Fermented vegetables    | Xuanwei City, Qujing City                                      |
| A7412   | Fermented vegetables    | Xuanwei City, Qujing City                                      |
| A754    | Fermented vegetables    | Xuanwei City, Qujing City                                      |
| A765    | Fermented vegetables    | Xuanwei City, Qujing City                                      |
| B231    | Fermented vegetables    | Chenggong District, Kunming City                               |
| B332    | Fermented vegetables    | Anning City, Kunming City                                      |
| B431    | Fermented vegetables    | Hongta District, Yuxi City                                     |
| B739    | Fermented bean products | Wuhua District, Kunming City                                   |
| B958    | Fermented vegetables    | Wuhua District, Kunming City                                   |
| C232    | Fermented vegetables    | Guangnan County, Wenshan Zhuang and Miao Autonomous Prefecture |
| C233    | Fermented vegetables    | Guangnan County, Wenshan Zhuang and Miao Autonomous Prefecture |
| C246    | Fermented vegetables    | Guangnan County, Wenshan Zhuang and Miao Autonomous Prefecture |
| C333    | Fermented vegetables    | Malong District, Qujing City                                   |
| C347    | Fermented vegetables    | Malong District, Qujing City                                   |
| C4507   | Fermented vegetables    | Fuyuan County, Qujing City                                     |
| C735    | Fermented vegetables    | Wuhua District, Kunming City,                                  |
| C831    | Fermented vegetables    | Jinggu County, Pu 'er City                                     |
| D0609   | Fermented bean products | Dali City, Dali Bai Autonomous Prefecture                      |
| D0904   | Fermented bean products | Dali City, Dali Bai Autonomous Prefecture                      |
| D2101   | Fermented vegetables    | Xishan District, Kunming City                                  |
| D266    | Fermented meat products | Hongta District, Yuxi City                                     |
| D2706   | Fermented vegetables    | Ludian County, Zhaotong City                                   |
| D3208   | Fermented bean products | Yongsheng County, Lijiang City                                 |
| D331    | Fermented vegetables    | Hongta District, Yuxi City                                     |
| D332    | Fermented vegetables    | Hongta District, Yuxi City                                     |
| D333    | Fermented vegetables    | Hongta District, Yuxi City                                     |
| D334    | Fermented vegetables    | Hongta District, Yuxi City                                     |
| D345    | Fermented vegetables    | Hongta District, Yuxi City                                     |

---

|               |                         |                                                                |
|---------------|-------------------------|----------------------------------------------------------------|
| D444          | Fermented vegetables    | Guangnan County, Wenshan Zhuang and Miao Autonomous Prefecture |
| D5205         | Fermented bean products | Xundian County, Kunming City                                   |
| D5809         | Fermented vegetables    | Xuanwei City, Qujing City                                      |
| E1031         | Fermented vegetables    | Wenshan Zhuang and Miao Autonomous Prefecture                  |
| E262          | Fermented vegetables    | Guangnan County, Wenshan Zhuang and Miao Autonomous Prefecture |
| E374          | Fermented meat products | Kunming City                                                   |
| E4201         | Fermented vegetables    | Wuding County, Chuxiong Yi Autonomous Prefecture               |
| E553          | Fermented vegetables    | Dali City, Dali Bai Autonomous Prefecture                      |
| E554          | Fermented vegetables    | Dali City, Dali Bai Autonomous Prefecture                      |
| E853          | Fermented meat products | Kunming City                                                   |
| E855          | Fermented meat products | Kunming City                                                   |
| E856          | Fermented meat products | Kunming City                                                   |
| E858          | Fermented meat products | Kunming City                                                   |
| E859          | Fermented meat products | Kunming City                                                   |
| E8611         | Fermented meat products | Kunming City                                                   |
| NZ_CP009236.1 | Fermented bean products | Yuxi City                                                      |

---
